# Supplementary material for: Glypican 1 promotes proliferation and migration in esophagogastric adenocarcinoma via activating AKT/GSK/β-catenin pathway
Source: PubMed Central journal article supplement — J Gastrointest Oncol. 2022 Oct;13(5):2082–104. doi: 10.21037/jgo-22-240 (PMC9660038; doi:10.21037/jgo-22-240), 2022-10
Supplement: jgo-13-05-2082-dss.pdf [file jgo-13-05-2082-dss.pdf]

## Data Sharing Statement

|                     |                                                                                                                                                     |                                                                                                                                                                                                                                                                                                                           |
|---------------------|-----------------------------------------------------------------------------------------------------------------------------------------------------|---------------------------------------------------------------------------------------------------------------------------------------------------------------------------------------------------------------------------------------------------------------------------------------------------------------------------|
| <b>Article Info</b> | <a href="https://dx.doi.org/10.21037/jgo-22-240">https://dx.doi.org/10.21037/jgo-22-240</a>                                                         |                                                                                                                                                                                                                                                                                                                           |
| <b>Item</b>         | <b>Question</b>                                                                                                                                     | <b>Authors' Response<br/>(place "-" if not applicable)</b>                                                                                                                                                                                                                                                                |
| 1                   | Would you like to share data collected for your study to others?                                                                                    | Yes                                                                                                                                                                                                                                                                                                                       |
| 2                   | If not, would you like to share the reason for your decision?                                                                                       | NA                                                                                                                                                                                                                                                                                                                        |
| 3                   | What data in particular will be shared?                                                                                                             | Patient survival data and ongoing recruitment                                                                                                                                                                                                                                                                             |
| 4                   | Any other documents will be shared? Such as study protocol, statistical analysis plan, informed consent form, clinical study report, analytic code. | Statistical analysis plan, informed consent form, and clinical study report will also be shared if requested.                                                                                                                                                                                                             |
| 5                   | When will data availability begin?                                                                                                                  | From date of publication                                                                                                                                                                                                                                                                                                  |
| 6                   | When will data availability end?                                                                                                                    | 2024                                                                                                                                                                                                                                                                                                                      |
| 7                   | To whom will you share the data?                                                                                                                    | Surgical oncologists                                                                                                                                                                                                                                                                                                      |
| 8                   | For what type of analysis or purpose?                                                                                                               | GPC1 antibody results                                                                                                                                                                                                                                                                                                     |
| 9                   | How or where can the data/documents be obtained?                                                                                                    | Contact <a href="mailto:Akshay.chauhan@cuanschutz.edu">Akshay.chauhan@cuanschutz.edu</a><br>Department of Surgery<br>University of Colorado<br>Anschutz Medical Campus<br>Mail Stop C313<br>12631 E. 17th Avenue, Room 6001<br>Aurora, Colorado 80045<br>o 3037242728<br>o 7208482070 (Bariatric Surgery)<br>f 3037242733 |
| 10                  | Any other restrictions?                                                                                                                             | NA                                                                                                                                                                                                                                                                                                                        |
